# Supplementary material
Source: Springer Nature journal article supplement (https://www.springermedizin.de/resource/supplementary/12943_2007_369_MOESM5_ESM.pdf/9554030)

A.

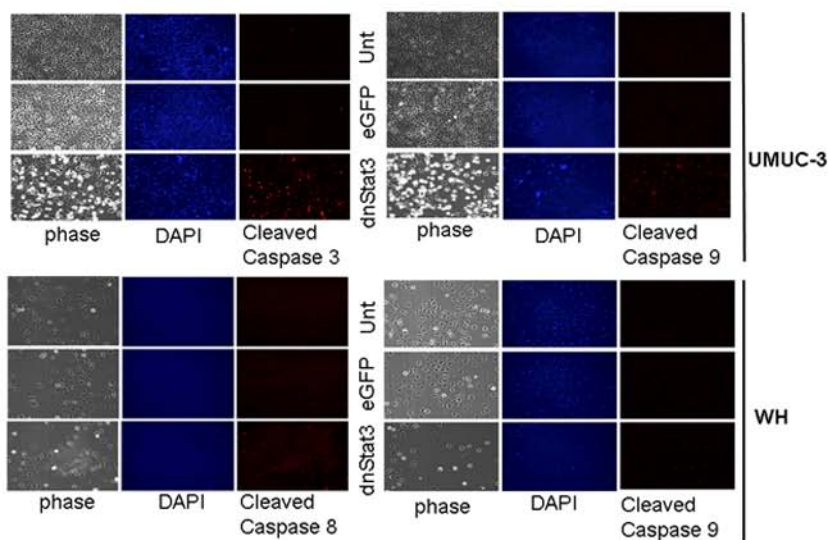

B.

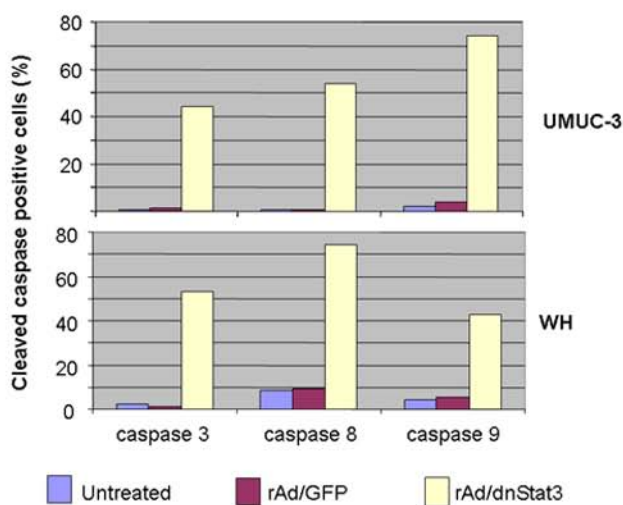

C.

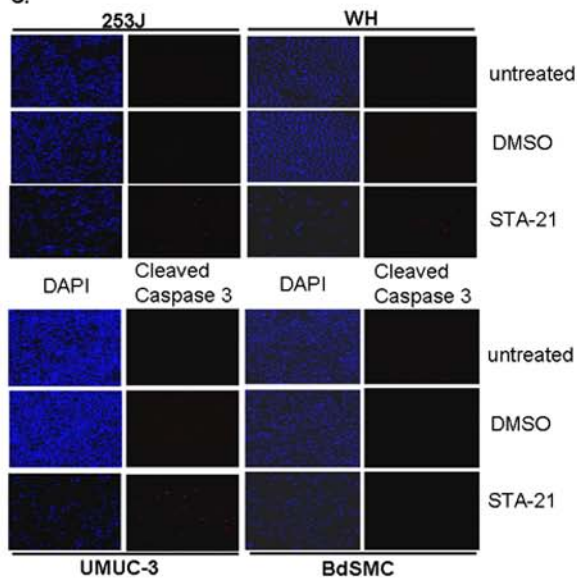

Supplement: MOESM5 [file 9554030]
